# Supplementary material for: Physiological, Diurnal and Stress-Related Variability of Cadmium-Metallothionein Gene Expression in Land Snails
Source: PLoS One. 2016 Mar 2;11(3):e0150442. doi: 10.1371/journal.pone.0150442 (PMC4774997; doi:10.1371/journal.pone.0150442)
Supplement: S2 Table — (XLSX) [file pone.0150442.s002.xlsx]

## Sheet: metal exposure
		Cd µg/g	Cd µg/g log
Tag 0	K	10.63	1.0265
Tag 0	K
Tag 0	K	15.82	1.1992
Tag 0	K	8.19	0.9133
Tag 0	K	20.03	1.3017
Tag 1	K	14.93	1.1741
Tag 1	K	13.26	1.1225
Tag 1	K	13.04	1.1153
Tag 1	K	17.62	1.246
Tag 1	K	25	1.3979
Tag 3	K	13.01	1.1143
Tag 3	K	14.72	1.1679
Tag 3	K	20.22	1.3058
Tag 3	K	62.81	1.798
Tag 3	K	8.95	0.9518
Tag 5	K	42.15	1.6248
Tag 5	K	14.42	1.159
Tag 5	K	12.81	1.1075
Tag 5	K	11.22	1.05
Tag 5	K	8.25	0.9165
Tag 8	K	17.42	1.241
Tag 8	K	11.32	1.0538
Tag 8	K	30.71	1.4873
Tag 8	K	45.31	1.6562
Tag 8	K	25.3	1.4031
Tag 14	K	21.52	1.3328
Tag 14	K	55	1.7404
Tag 14	K	10.56	1.0237
Tag 14	K	11.65	1.0663
Tag 14	K	14.31	1.1556
Tag 0	Cd	10.63	1.0265
Tag 0	Cd
Tag 0	Cd	15.82	1.1992
Tag 0	Cd	8.19	0.9133
Tag 0	Cd	20.03	1.3017
Tag 1	Cd	28.95	1.4616
Tag 1	Cd	41.06	1.6134
Tag 1	Cd	66.61	1.8235
Tag 1	Cd	40.4	1.6064
Tag 1	Cd	16.92	1.2284
Tag 3	Cd	37.88	1.5784
Tag 3	Cd	72.36	1.8595
Tag 3	Cd	187.47	2.2729
Tag 3	Cd	68.47	1.8355
Tag 3	Cd	24.08	1.3817
Tag 5	Cd	119.91	2.0789
Tag 5	Cd	196.14	2.2926
Tag 5	Cd	18.42	1.2653
Tag 5	Cd	17.88	1.2524
Tag 5	Cd	72.84	1.8624
Tag 8	Cd	81.86	1.9131
Tag 8	Cd	333.55	2.5232
Tag 8	Cd	8.63	0.936
Tag 8	Cd	44.2	1.6454
Tag 8	Cd	52.11	1.7169
Tag 14	Cd	77.54	1.8895
Tag 14	Cd	125.76	2.0995
Tag 14	Cd	131.93	2.1203
Tag 14	Cd	24.32	1.386
Tag 14	Cd	45.36	1.6567

## Sheet: desiccation
Desiccation 2011
day 0
controls
K 1	14.2083
K 2	20.9155
K 3	11.3056
K 4	24.75
K 5	21.1538
day 21
controls		desiccated snails
K 1	12.506	A 1	19.5103
K 2	11.9355	A 2	13.75
K 3	17.5845	A 3	12.6923
K 4	9.47445	A 4	8.33333
K 5	11.1392	A 5	14.1429

## Sheet: diurnal experiment
	K1	9.11043				Cd1	71.5				red and grey	non-feeder	NF
	K2	20.9524				Cd2	54.2466				green	feeder	F
	K3					Cd3	162.25
	K4	8.42742				Cd4	307.656
	K5	8.89362				Cd5	283.148
	K6	15.3165				Cd6
	K7	28.4483				Cd7	407
	K8	18.9344				Cd8	71.25
	K9	8.05941				Cd9	219.5
	K10	14.4878				Cd10	104.587
	K11	6.22642				Cd11
	K12	10.6667				Cd12	425.333
	K13	28.6282				Cd13	363.559
	K14	7.65217				Cd14	110.815
	K15	7.425				Cd15	36.9787
	K16	11.6667				Cd16	46.4286
	K17	8.99371				Cd17	255.619
	K18	10.8642				Cd18	241.602
	K19	24.8947				Cd19	285.245
	K20	15.1099				Cd20	306.429
	K21	31.24				Cd21	24.1205
	K22	9.74684				Cd22	455.981
	K23	10.7317				Cd23
	K24	11.7674				Cd24
	K25	25.0556				Cd25	430.941
	K26	12.1186				Cd26	85.871
	K27	12.9412				Cd27	375.426
	K28	13.5246				Cd28
	K29	36.08				Cd29	309.523
	K30	12.8723				Cd30	385
